# Supplementary material
Source: Springer Nature journal article supplement (https://www.springermedizin.de/resource/supplementary/12879_2004_166_MOESM3_ESM.pdf/9448324)

1 2 3 4 5 6 7 8

bp

400 ---  
300 ---  
200 ---  
100 ---  
50 ---

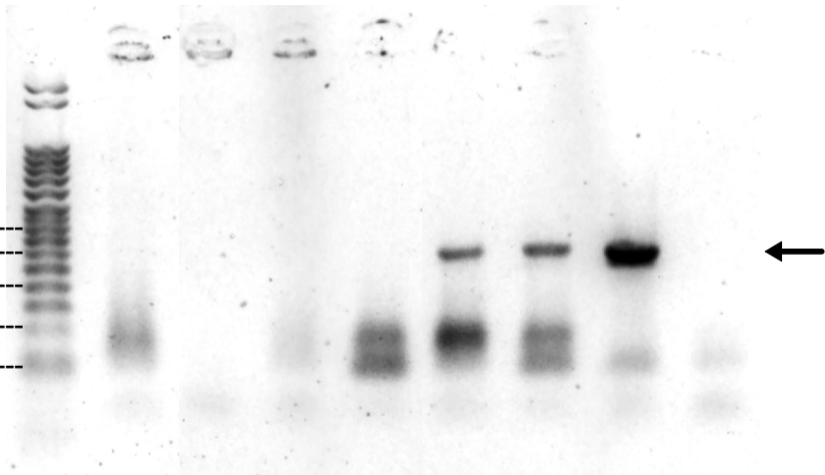

Supplement: MOESM3 [file 9448324]
